# Supplementary material for: A promising nanohybrid of silicon carbide nanowires scrolled by graphene oxide sheets with a synergistic effect for poly(propylene carbonate) nanocomposites
Source: Royal Society of Chemistry journal article supplement (doi:10.1039/c7ta06080g), 2017-01-01
Supplement: c7ta06080g1.pdf [file c7ta06080g1.pdf]

## Supplementary Information

### A promising nanohybrid of silicon carbide nanowires scrolled by graphene oxide sheets with synergistic effect for poly(propylene carbonate) nanocomposites

Hao Qu,<sup>a</sup> Yong Wang,<sup>a</sup> Yun Sheng Ye,<sup>a\*</sup> Wei Zhou<sup>b</sup>, Shou Ping Bai<sup>b</sup>, Xing Ping Zhou,<sup>a</sup> Hai Yan Peng,<sup>a</sup> Xiao Lin Xie<sup>a\*</sup> and Yiu-Wing Mai<sup>b</sup>

<sup>a</sup>Key laboratory of Material Chemistry for Energy Conversion and Storage, Ministry of Education, School of Chemistry and Chemical Engineering, Huazhong University of Science and Technology, Wuhan 430074, China.

<sup>b</sup>BYD Company Limited; No. 3009, BYD Road, Pingshan, Shenzhen.

<sup>c</sup>Centre for Advanced Materials Technology (CAMT), School of Aerospace, Mechanical and Mechatronic Engineering J07, The University of Sydney, Sydney, NSW 2006, Australia.

#### Dispersion amount of SiC nanowires in the SiC/GO suspension

The SiC/GO dispersions with the concentration of 2 mg ml<sup>-1</sup> was estimated by weighting the amount of the dispersed solid (upper layer after standing overnight) after evaporation process. The content of SiC nanowires in the resulting SiC/GO dispersed solid was then analyzed by TGA. The dispersion amount of SiC was calculated using equations:  $Y = M_u / M_o$ . Where  $M_u$  is the content of SiC nanowires in the upper layer of SiC/GO suspension,  $M_o$  is the content of SiC nanowires in the original SiC/GO suspension. The dispersion amount of SiC means the amount of SiC dispersed by GO sheets. Dispersion stability was studied by UV-vis absorption spectra as shown in **Figure S1**.

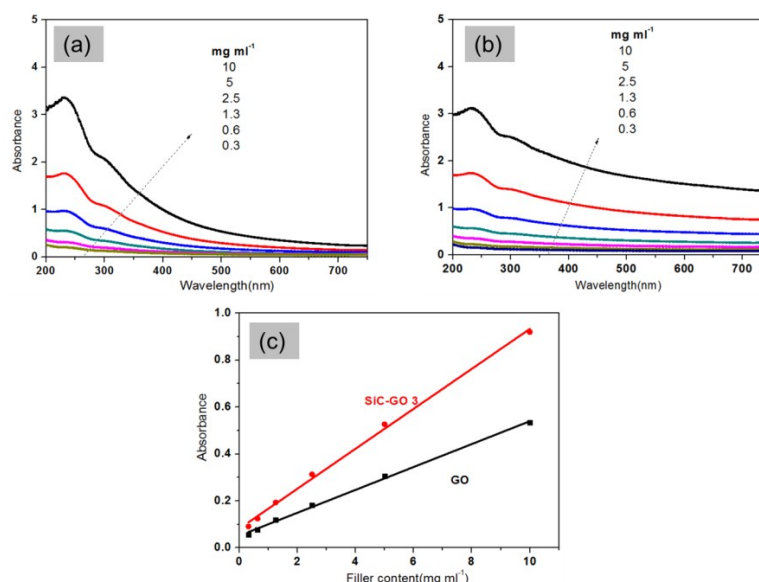

**Figure S1.** UV-vis absorption spectra of (a) GO and (b) SiC-GO 3 hybrid dispersed in water with different concentrations; (c) optical density at 500 nm of SiC-GO and GO at different concentrations.

### Hydrogen interactions between GO and SiC

We assumed that the abundant oxygen groups of GO interact with the surface hydroxyl groups of SiC through hydrogen bonding, and then a SiC/GO scroll-like structure was formed. The hydrogen bonding was analyzed by FTIR in this study and result was presented in **Figure S2**. For the convenience of observation, the weight ratio of GO to SiC (GO/SiC=0-50) used in the mixture are different from that used for the fabrication of composites (GO/SiC=1). **Figure S2 (a)** shows that the interactions between SiC and GO weaken the interaction of GO itself, so the frequencies of peak at  $1618\text{ cm}^{-1}$  corresponding to the C=O bonds present in GO is slightly shifted towards high wavenumbers with increasing amount of SiC in the GO/SiC nanohybrid. Additionally, **Figure S2 (b)** shows the peak at  $941\text{ cm}^{-1}$  corresponding to the O-H bonds of SiC were lowered ( $4\text{-}5\text{ cm}^{-1}$ ) by the increasing amount of GO in the SiC/GO nanohybrid. These results indicate that the interactions between OH groups of SiC and COOH groups of GO weaken the interactions of GO itself, which is in a good agreement with our morphological observation for the SiC/GO nanohybrids.

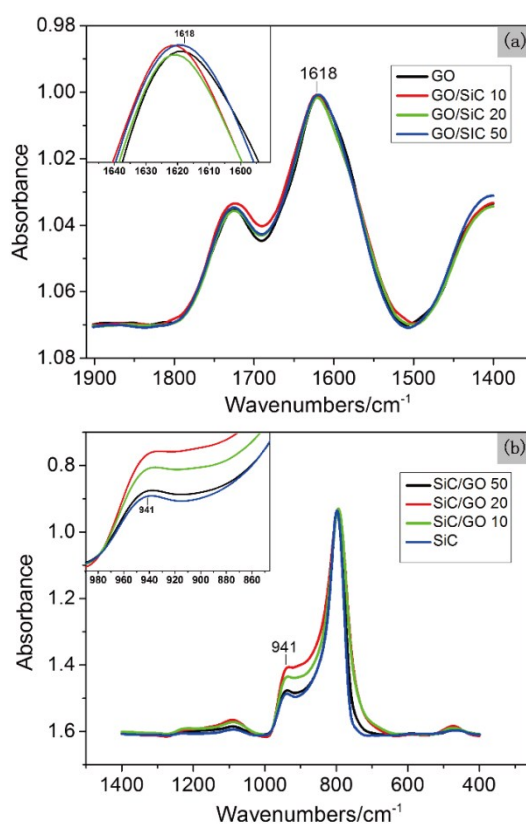

**Figure S2.** FTIR spectra of (a) GO and nanohybrids with different GO/SiC ratios; (b) SiC and nanohybrids with different SiC/GO ratios.

## Tensile properties of neat PPC and PPC-SiC/GO nanocomposites

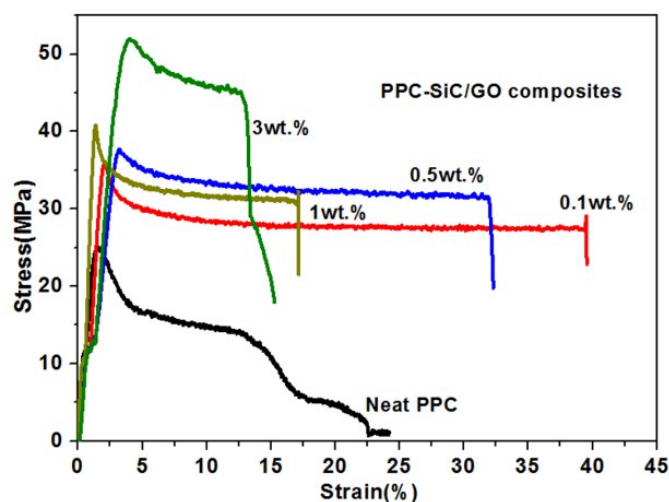

**Figure S3.** Tensile properties of neat PPC and PPC-SiC/GO nanocomposites composites with different filler contents.

### Theoretical values of tensile modules of PPC-based nanocomposites

The SiC nanowires composites were considered as random oriented discontinuous fibers, and the GO sheets were assumed as effective rectangular solid fibers, the modulus of the PPC-SiC and PPC-GO composites can be calculated from the Equations S1 and S2, respectively.

#### PPC-SiC composite:

$$E_c = \frac{3}{8} \frac{1+2 \left( \frac{l_{NT}}{d_{NT}} \right) \left[ \frac{E_R-1}{E_R+2(l_{NT}/d_{NT})} \right]}{1 - \left[ \frac{E_R-1}{E_R+2(l_{NT}/d_{NT})} \right]} \times E_M + \frac{5}{8} \frac{1+2 \left[ \frac{E_R-1}{E_R+2} \right] V_{NT}}{1 - \left[ \frac{E_R-1}{E_R+2} \right] V_{NT}} \times E_M \quad S1$$

In the Halpin–Tsai model,  $E_c$  is the tensile modulus of the composite,  $l_{NT}$  is the length of nanowires (100  $\mu\text{m}$ ),  $d_{NT}$  is the average diameter of the nanotubes (300 nm),  $E_R = E_{eq}/E_M$ ,  $E_{eq}$  is the equivalent modulus of nanowires (581 GPa),  $E_M$  is the tensile modulus of PPC matrix (3.03GPa) and  $V_{NT}$  is the volume content of the nanowires.

#### PPC-GO composite:

$$E_c = \frac{3}{8} \frac{1+((W/L)/t) \left[ \frac{E_r-1}{E_r+((W/L)/t)} \right] V_{GPL}}{1 - \left[ \frac{E_r-1}{E_r+((W/L)/t)} \right] V_{GPL}} \times E_M + \frac{5}{8} \frac{1+2 \left[ \frac{E_r-1}{E_r+2} \right] V_{GPL}}{1 - \left[ \frac{E_r-1}{E_r+2} \right] V_{GPL}} \times E_M \quad S2$$

In the modified Halpin–Tsai model,  $E_c$  is the tensile modulus of the composite,  $W$  is the

average width of GO sheets ( $5 \mu\text{m}$ ),  $L$  is the average length of the GO sheets ( $5\mu\text{m}$ ),  $t$  is the average thickness of GO sheets ( $1.1\text{nm}$ ),  $E_r = E_{GPL}/E_M$ ,  $E_{GPL}$  is the equivalent modulus of GO sheets ( $1.11 \text{TPa}$ ),  $E_M$  is the tensile modulus of PPC matrix ( $3.03 \text{GPa}$ ) and  $V_{GPL}$  is the volume content of the GO sheets.

The  $V_{NT}$  and  $V_{GPL}$  in equation S1 and S2 can be calculated from wt % of SiC nanowires and GO sheets, respectively.
